# Supplementary material
Source: PubMed Central journal article supplement (PMC4102643)

## Supplementary Table

|                                          | Grade 1 |       | Grade 2 |       | Grade 3 |       | Grade 4 |       |
|------------------------------------------|---------|-------|---------|-------|---------|-------|---------|-------|
|                                          | Arm 1   | Arm 2 |
| <b>Allergy / Immunology</b>              |         |       |         |       |         |       |         |       |
| Allergic reaction (including angioedema) |         | 1     |         |       | 1       |       |         |       |
| <b>Cardiac</b>                           |         |       |         |       |         |       |         |       |
| Hypertension                             | 1       |       |         |       |         |       |         |       |
| <b>Constitutional Symptoms</b>           |         |       |         |       |         |       |         |       |
| Fatigue                                  | 2       | 2     |         |       |         |       |         |       |
| Rigors / chills                          | 4       |       |         |       |         |       |         |       |
| Fever without neutropenia                | 1       | 1     |         |       |         |       |         |       |
| <b>Dermatology / Skin</b>                |         |       |         |       |         |       |         |       |
| Injection site reaction                  | 47      | 86    |         |       |         |       |         |       |
| Rash / desquamation                      |         |       | 1       |       |         |       |         |       |
| Other                                    | 1       |       |         |       |         |       |         |       |
| <b>Endocrine</b>                         |         |       |         |       |         |       |         |       |
| Hot flashes                              |         | 1     |         |       |         |       |         |       |
| <b>Gastrointestinal</b>                  |         |       |         |       |         |       |         |       |
| Heart burn / dyspepsia                   |         | 1     |         |       |         |       |         |       |
| Constipation                             | 2       |       |         |       |         |       |         |       |
| Nausea                                   | 2       | 1     |         |       |         |       |         |       |
| <b>Neurology</b>                         |         |       |         |       |         |       |         |       |
| Dizziness                                | 3       | 1     |         |       |         |       |         |       |
| <b>Pain</b>                              |         |       |         |       |         |       |         |       |
| Back pain                                |         |       |         | 1     |         |       |         |       |
| Head pain / headache                     |         | 1     |         |       |         |       |         |       |
| Chest/thorax pain                        | 2       |       |         |       |         |       |         |       |
| Joint pain                               | 1       | 2     |         |       |         |       |         |       |
| Muscle pain                              | 1       | 2     |         |       |         |       |         |       |
| <b>Pulmonary</b>                         |         |       |         |       |         |       |         |       |
| Dyspnea                                  | 1       |       |         |       |         |       |         |       |
| <b>Syndromes</b>                         |         |       |         |       |         |       |         |       |
| Flu-like syndrome                        |         | 2     |         |       |         |       |         |       |

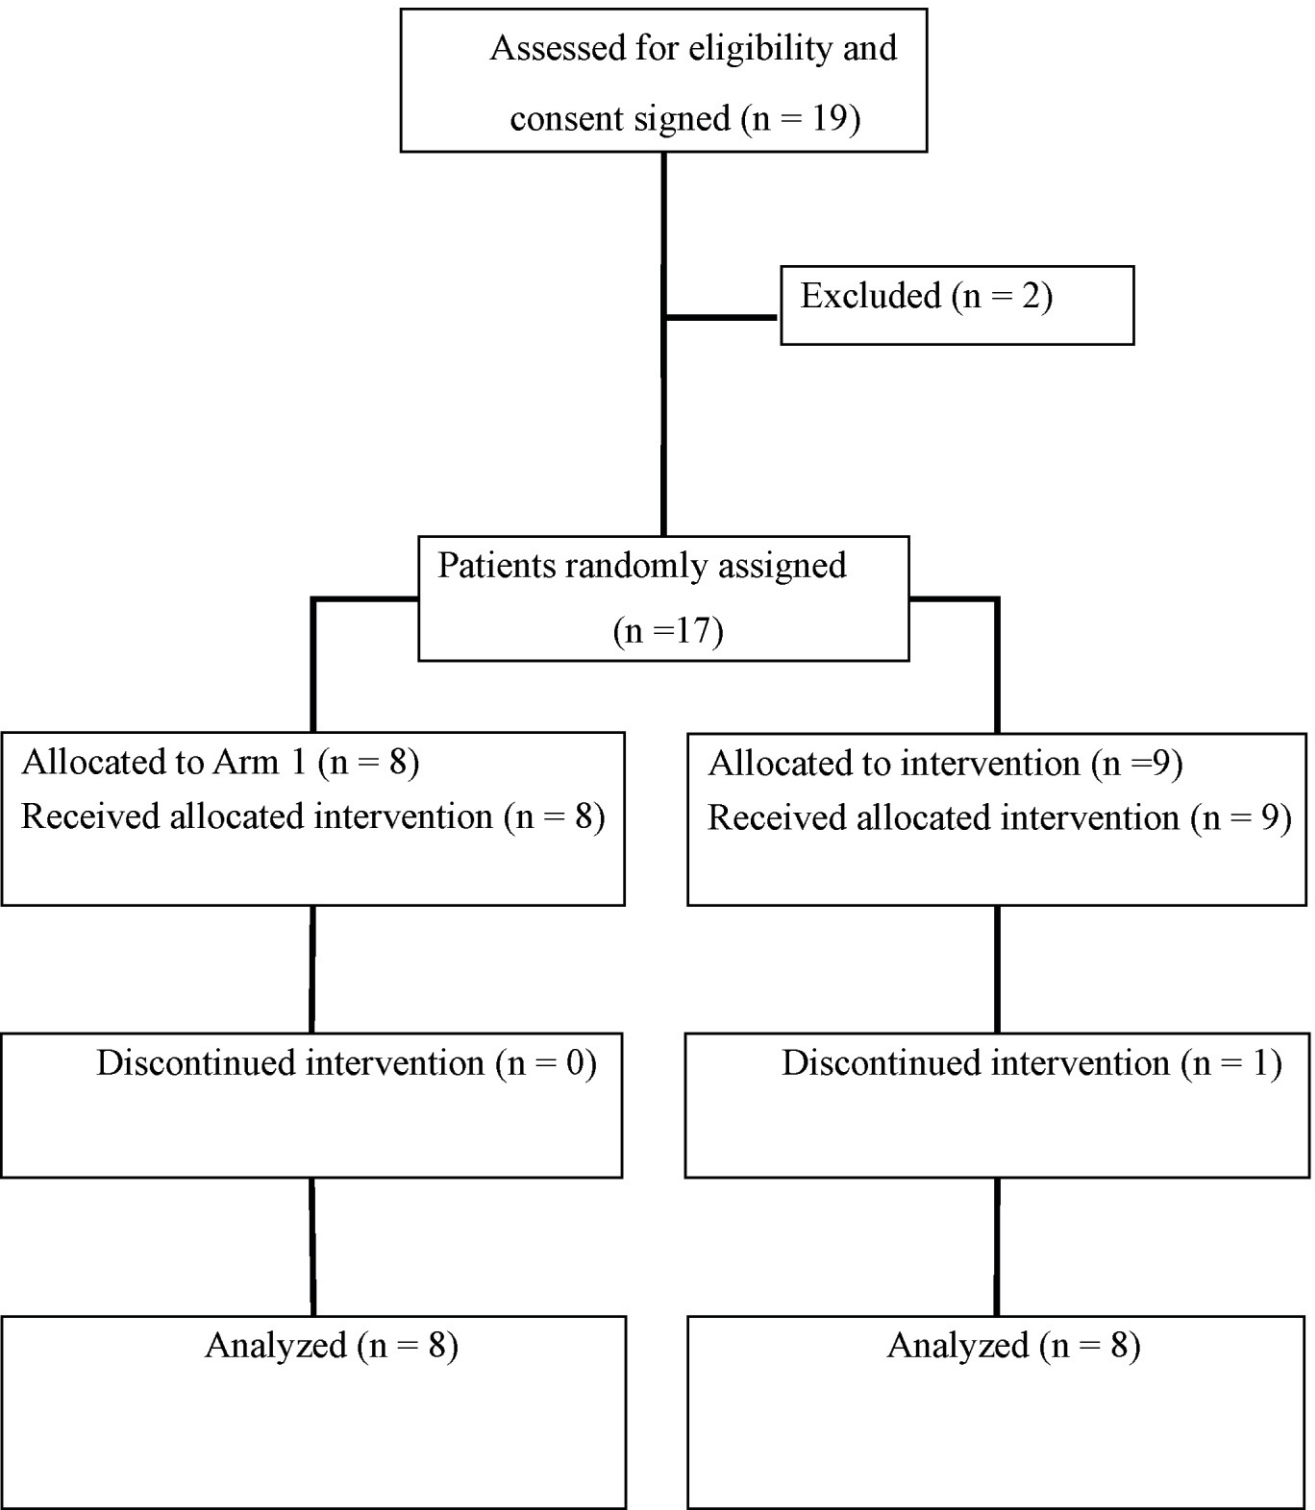

**A**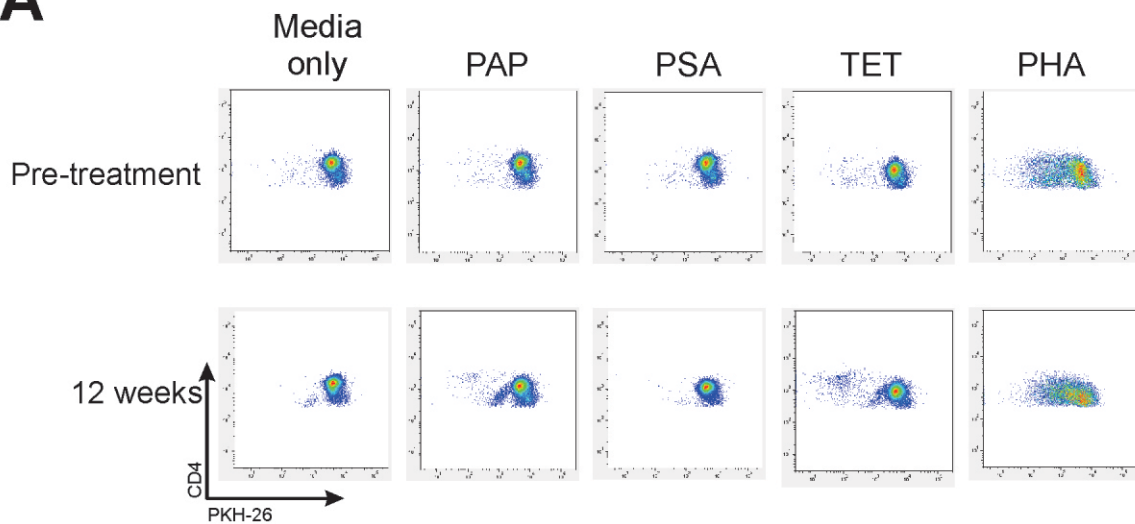**B**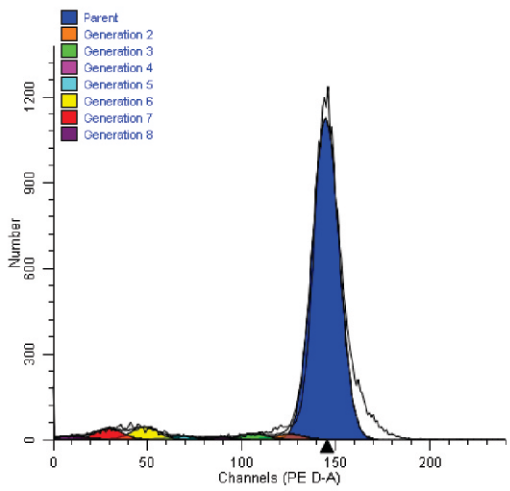**C**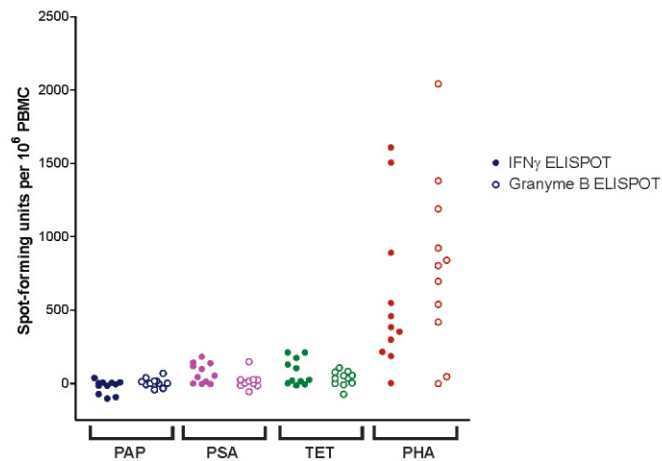

TET

### CD8+ T cells

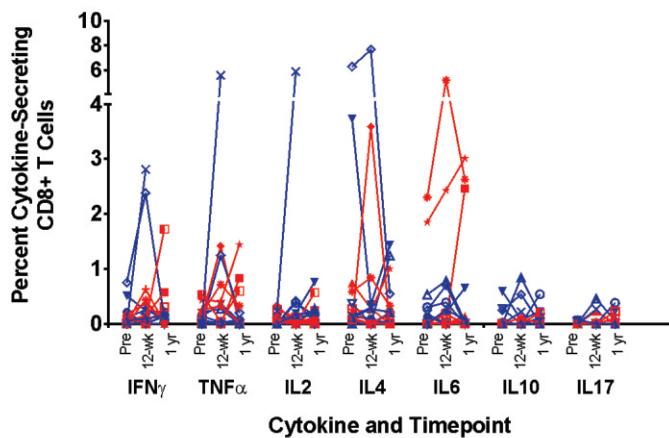

### CD4+ T cells

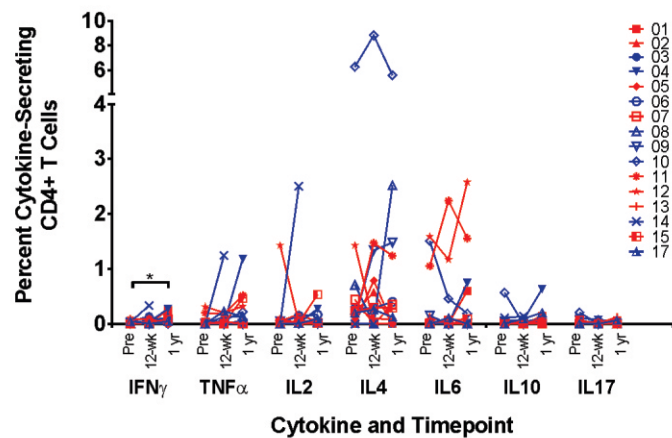

PSA

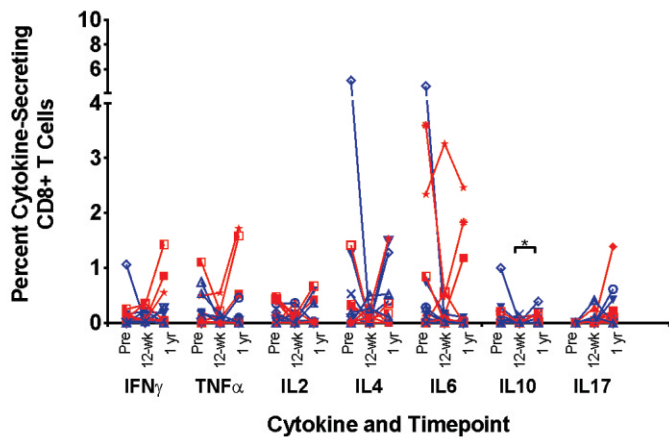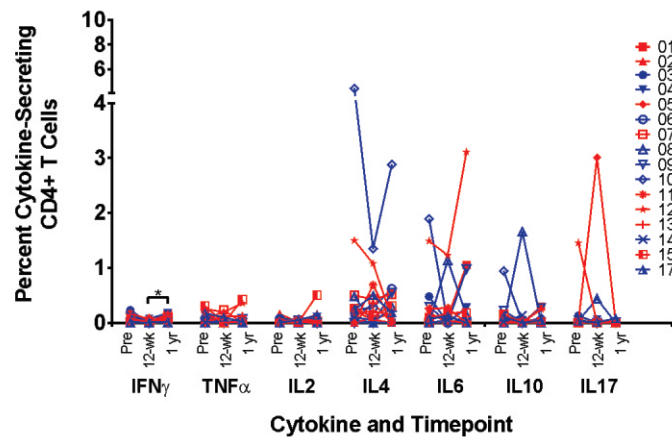

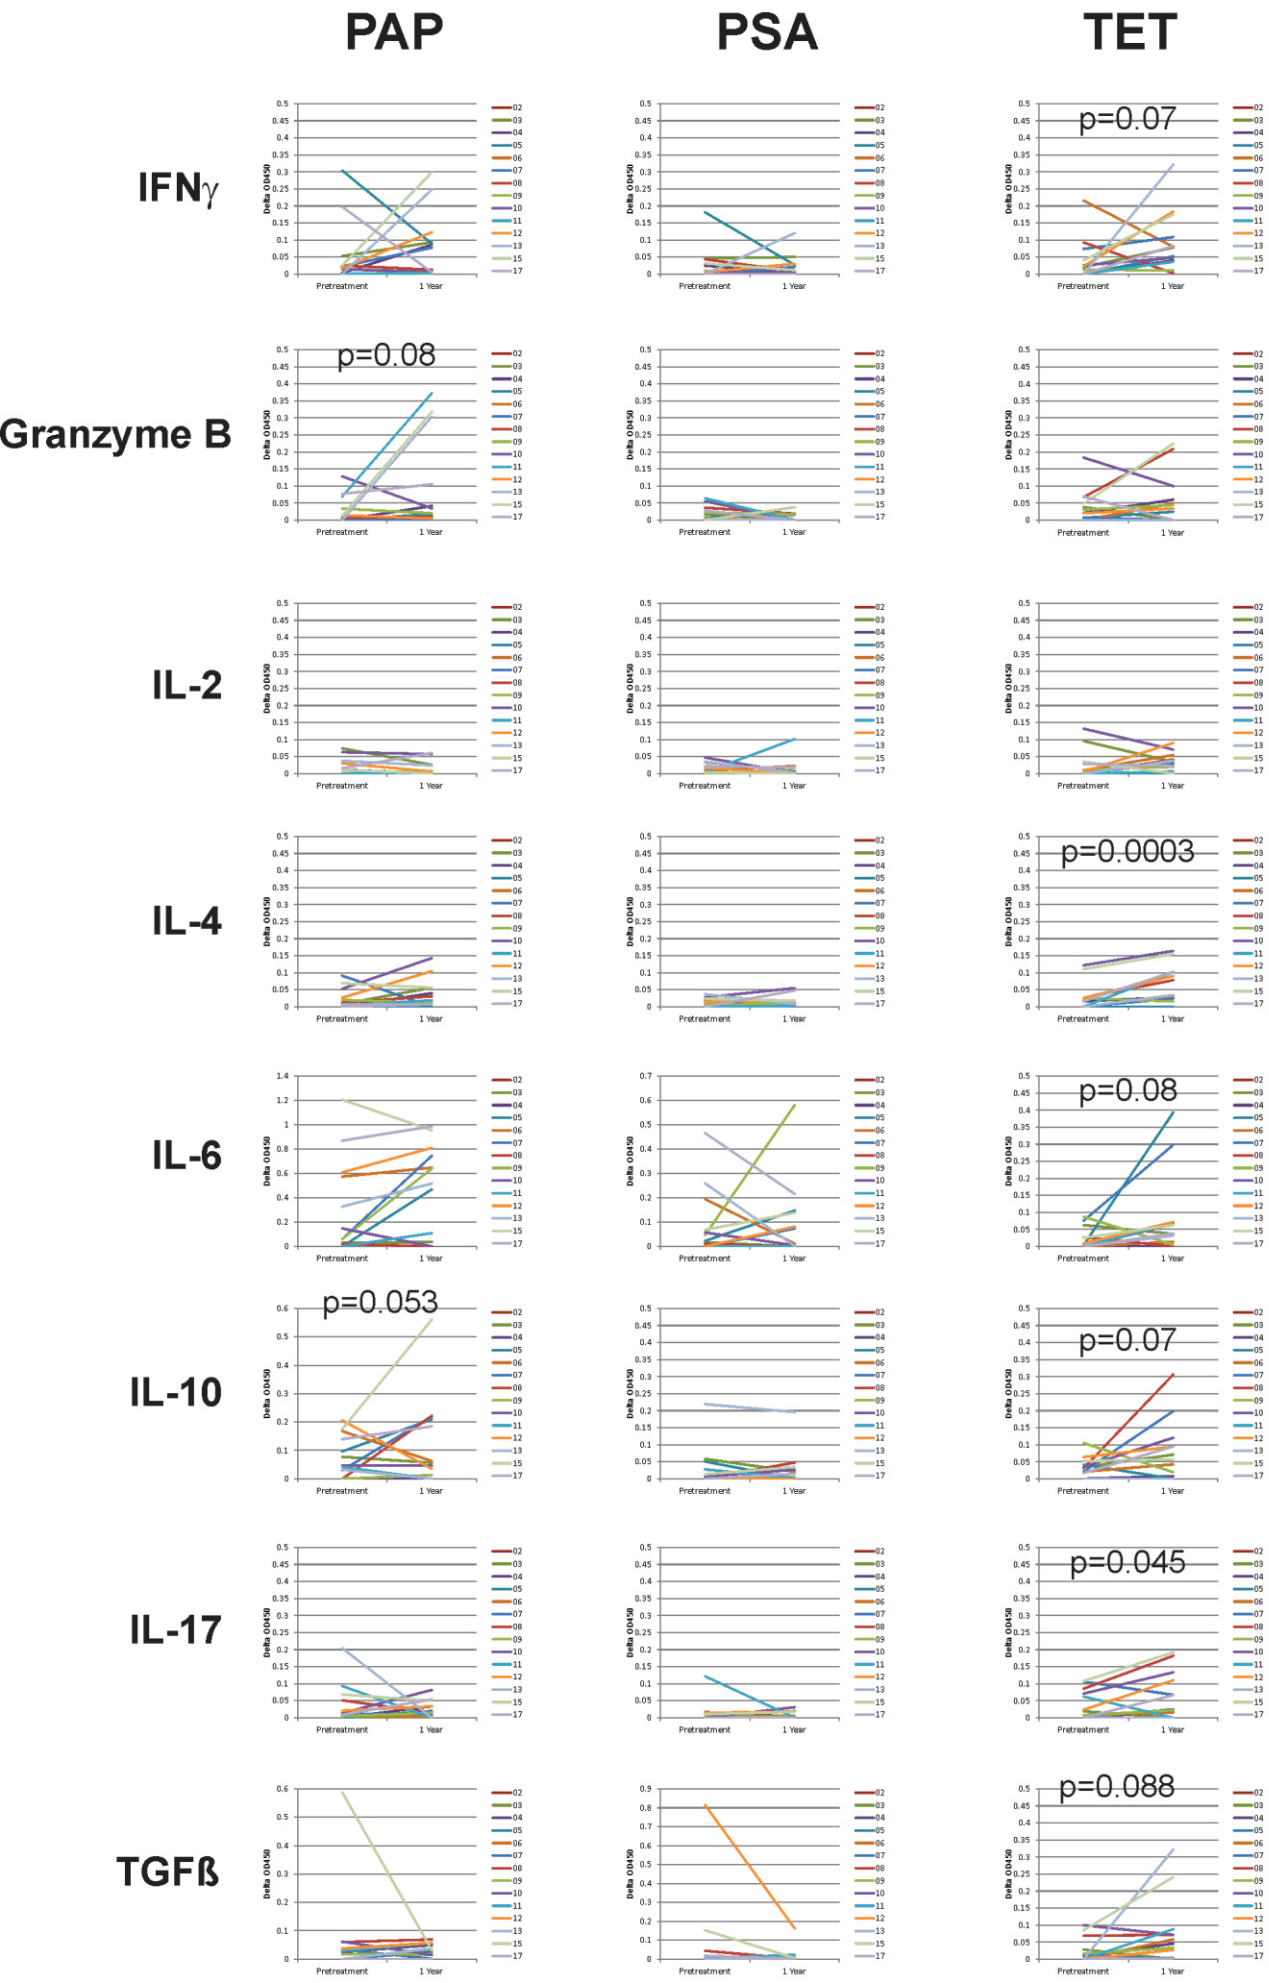

Supplement: NIHMS597294-supplement-2.pdf [file NIHMS597294-supplement-2.pdf]
